# Supplementary material for: Human Galectin-1 Improves Sarcolemma Stability and Muscle Vascularization in the mdx Mouse Model of Duchenne Muscular Dystrophy
Source: PubMed Central journal article supplement — Mol Ther Methods Clin Dev. 2019 Jan 22;13:145–53. doi: 10.1016/j.omtm.2019.01.004 (PMC6369265; doi:10.1016/j.omtm.2019.01.004), 2019-01-22
Supplement: mmc1.pdf [file mmc1.pdf]

**OMTM, Volume 13**

**Supplemental Information**

**Human Galectin-1 Improves Sarcolemma Stability**

**and Muscle Vascularization in the mdx Mouse**

**Model of Duchenne Muscular Dystrophy**

**Ryan D. Wuebbles, Vivian Cruz, Pam Van Ry, Pamela Barraza-Flores, Paul D. Brewer, Peter Jones, and Dean J. Burkin**

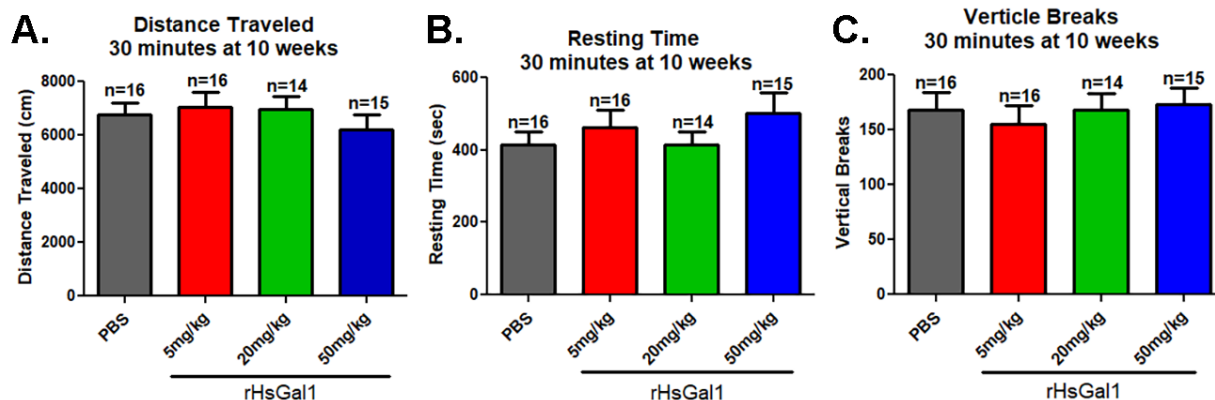

### Supplemental Figure Legends

**Figure S1. Activity Parameters examined at 10 weeks of age in mdx mice treated with PBS or 5, 20, or 50 mg/kg rHsGal1.** Mice were assessed for 30 minutes for distance traveled (A), resting time (B), and number of vertical breaks (C).

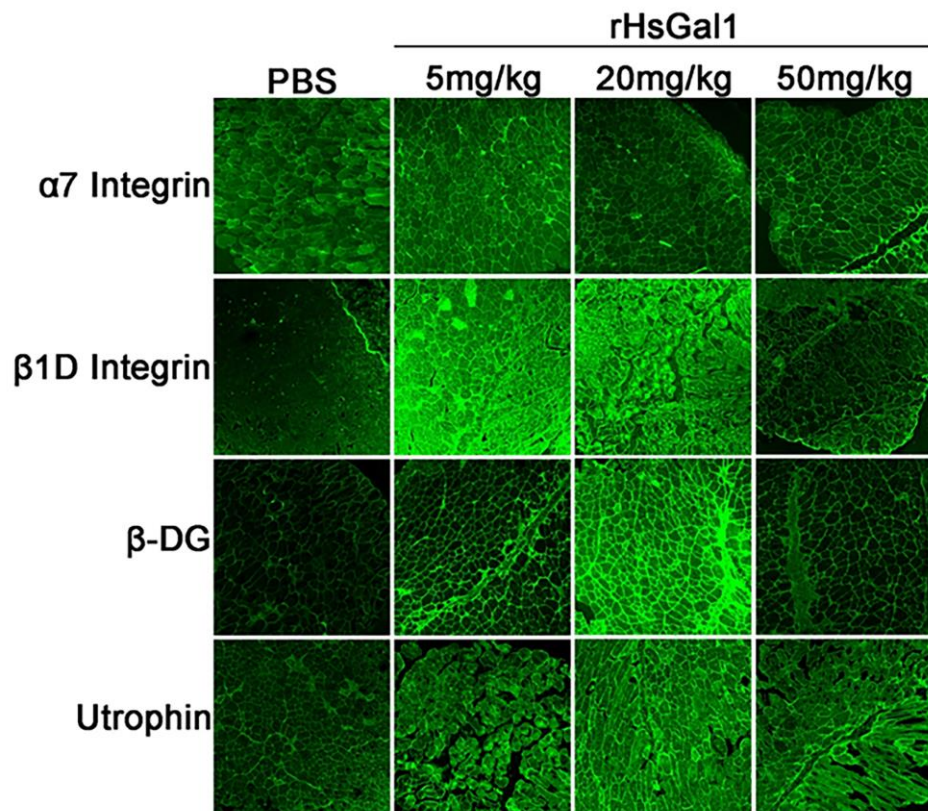

**Figure S2.** Immunofluorescence staining for sarcolemma stabilizing  $\alpha 7$  Integrin,  $\beta 1D$  Integrin,  $\beta$ -Dystroglycan, and Utrophin proteins in the *mdx* mouse treatment groups.

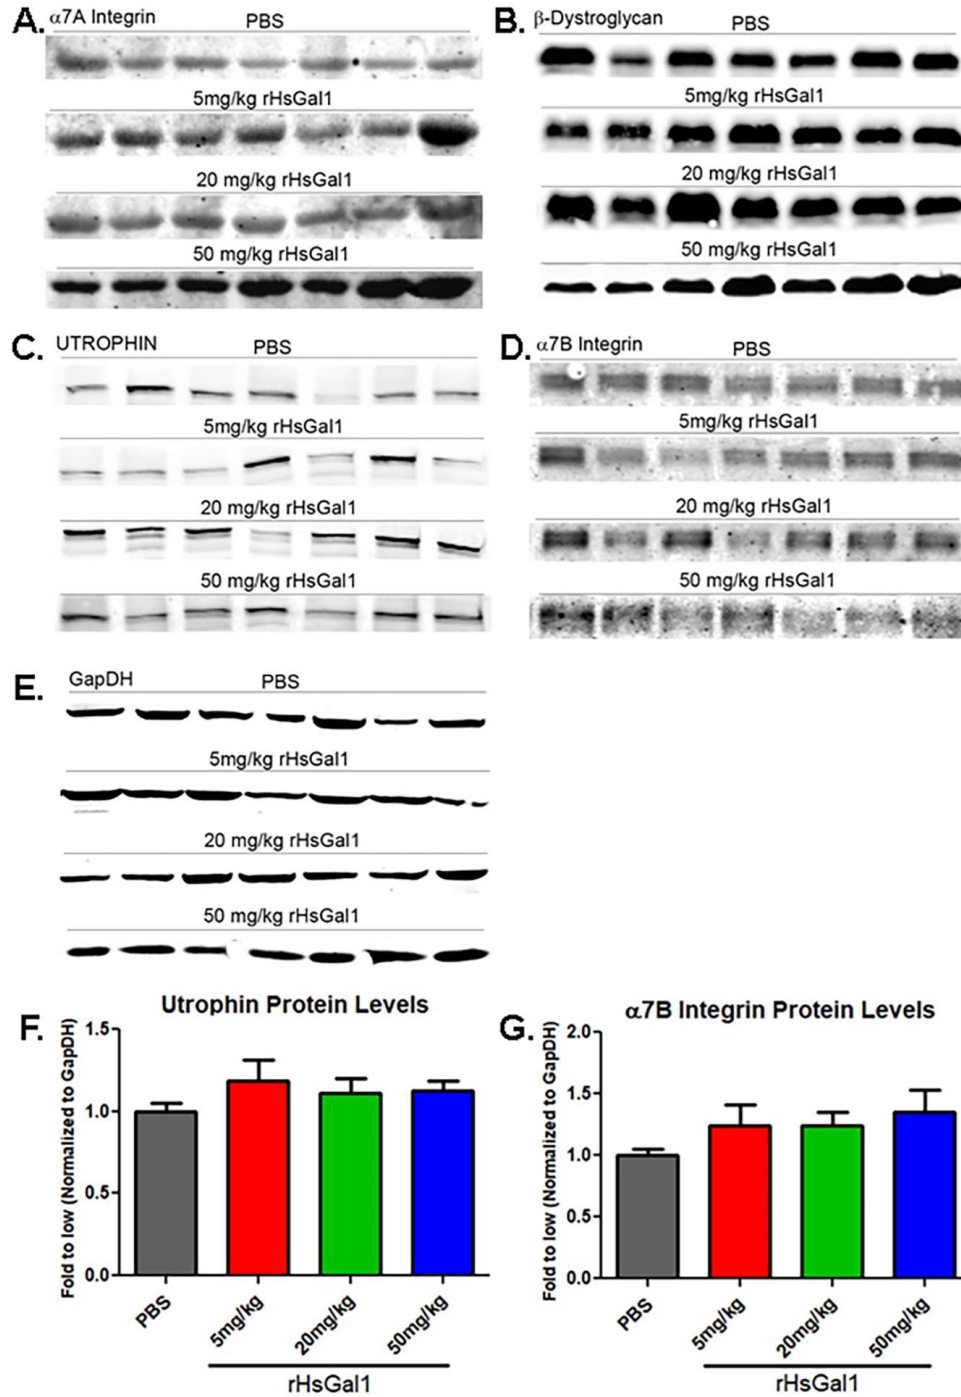

**Figure S3. Gastrocnemius sarcolemma protein levels of *mdx* treated with PBS or 5, 20, and 50mg/kg rHsGal1.** Representative western blots of different treatments probed with  $\alpha$ 7A Integrin (A),  $\beta$ -Dystroglycan (B), Utrophin (C),  $\alpha$ 7B Integrin (D), and GapDH (E). Quantification of Utrophin (F) and  $\alpha$ 7B Integrin (G) western blots normalized to GapDH.

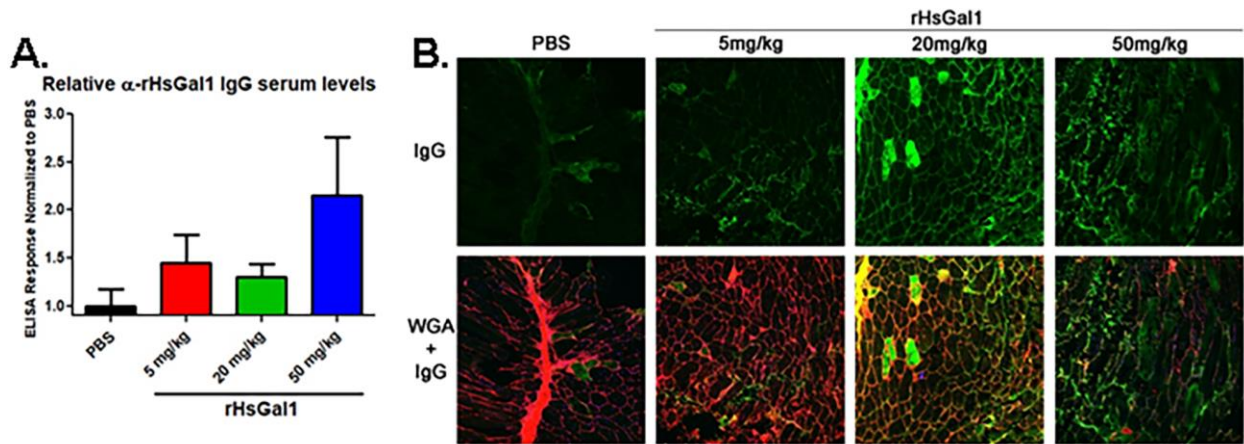

**Figure S4. Mice exhibit IgG response to rHsGal1 treatments. (A)** ELISA-based assessment of  $\alpha$ -rHsGal1 IgG serum levels in *mdx* mice treated with 5 mg/kg (n=5), 20 mg/kg (n=6), and 50 mg/kg (n=5) rHsGal1 normalized to PBS (n=6) controls. **(B)** Representative IF images of staining for total mouse IgG in *mdx* mouse TA muscle cryosections treated with PBS or 5, 20, or 50 mg/kg rHsGal1.

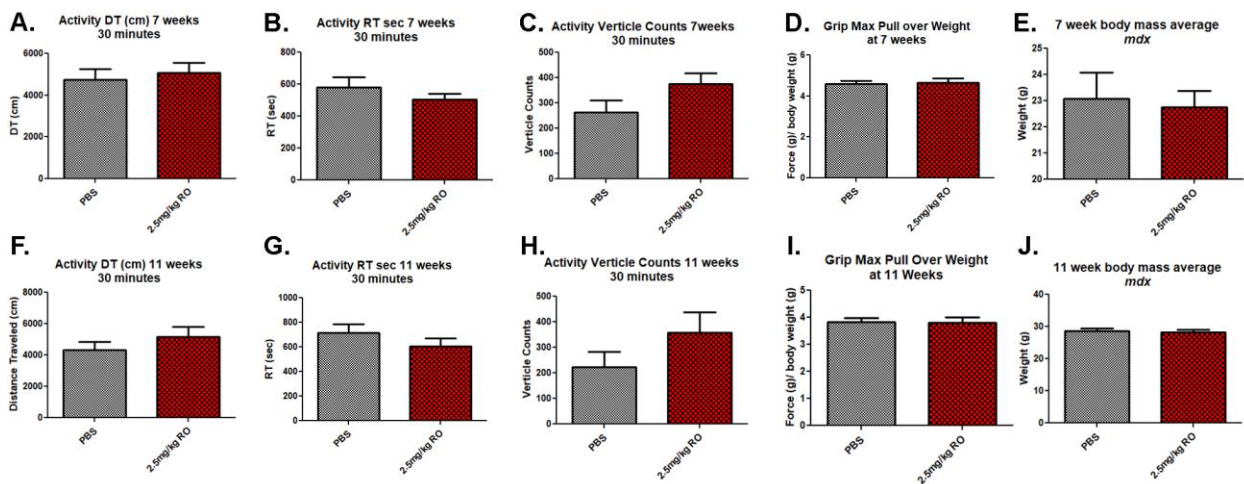

**Figure S5. Activity, grip strength, and body weight from 7 and 11 week old *mdx* mice treated with PBS or 2.5mg/kg rHsGal1 by IV injection.** Activity data was collected from treated animals and assessed for distance traveled (**A, F**), resting time (**B, G**), and verticle counts (**C, H**) at 7 and 11 weeks, respectively. Grip strength assessment (**D, I**) and body mass (**E, J**) were also assessed at 7 and 11 weeks of age.
